# Supplementary material for: Pisum sativum Defensin 1 Eradicates Mouse Metastatic Lung Nodules from B16F10 Melanoma Cells
Source: MDPI journal article supplement (doi:10.3390/ijms21082662), 2020-04-11
Supplement: s1 [file s1]

**Table S1.** Non-covalent interactions between *Psdl* and cyclin F. Legend for types of interactions: HB, Hydrogen bond; EA, Electrostatic attraction; HC, Hydrophobic contact and VDW, Van der Waals interaction.

| <i>Psdl</i> residue                                                                                                                  | Cyclin F residue                                                                                                                                                                         | Interaction Type |
|--------------------------------------------------------------------------------------------------------------------------------------|------------------------------------------------------------------------------------------------------------------------------------------------------------------------------------------|------------------|
| Leu6                                                                                                                                 | Tyr177                                                                                                                                                                                   | HB, VDW          |
| Arg11                                                                                                                                | Lys470                                                                                                                                                                                   | HB, VDW          |
| Gly12                                                                                                                                | Lys470                                                                                                                                                                                   | HB, VDW          |
| Ala28                                                                                                                                | Lys171                                                                                                                                                                                   | HB, VDW          |
| His29                                                                                                                                | Tyr147                                                                                                                                                                                   | HB, VDW          |
| Ile31                                                                                                                                | Tyr147                                                                                                                                                                                   | HB, VDW          |
| Cys35                                                                                                                                | Arg546                                                                                                                                                                                   | HB, VDW          |
| Trp38                                                                                                                                | Ile543                                                                                                                                                                                   | HB, VDW          |
| Trp38                                                                                                                                | Glu545                                                                                                                                                                                   | HB, VDW          |
| Lys39                                                                                                                                | Pro233                                                                                                                                                                                   | HB, VDW          |
| Gln44                                                                                                                                | His175                                                                                                                                                                                   | HB, VDW          |
| Asn45                                                                                                                                | Tyr147                                                                                                                                                                                   | HB, VDW          |
| Arg11                                                                                                                                | Glu275                                                                                                                                                                                   | 2 HBs, EA, VDW   |
| Arg11                                                                                                                                | Glu429                                                                                                                                                                                   | EA               |
| Lys39                                                                                                                                | Asp235                                                                                                                                                                                   | HB, EA, VDW      |
| Leu6                                                                                                                                 | Pro230                                                                                                                                                                                   | HC, VDW          |
| Leu6                                                                                                                                 | Pro233                                                                                                                                                                                   | HC, VDW          |
| Val13                                                                                                                                | Ile472                                                                                                                                                                                   | HC, VDW          |
| Phe15                                                                                                                                | Ile472                                                                                                                                                                                   | HC, VDW          |
| Phe15                                                                                                                                | Pro563                                                                                                                                                                                   | HC, VDW          |
| Cys3, His5, Ala7, Asp8, Arg11,<br>Cys14, Thr16, Ala28, Leu30,<br>Cys35, His36, Asn37, Trp38,<br>Lys39, Thr43, Gln44, Asn45,<br>Cys46 | Leu145, Gly146, Tyr147,<br>Leu148, Tyr177, Tyr178,<br>Met179, Glu180, Ala234,<br>Met273, Asp469, Lys470, Arg471,<br>Arg487, His544,<br>Glu545, Arg546, Trp562, Pro563,<br>Gly585, Arg586 | VDW              |
